# Supplementary material for: Evaluation of the Use of Home Blood Pressure Measurement Using Mobile Phone-Assisted Technology: The iVitality Proof-of-Principle Study
Source: PubMed Central journal article supplement (PMC4923587; doi:10.2196/mhealth.5485), 2016-06-13
Supplement: mhealth_v4i2e67_app1.pdf [file mhealth_v4i2e67_app1.pdf]

|                                               | All<br>participants<br>N=151 | Monthly<br>measurements<br>N=66 | Semi-monthly<br>measurements<br>N=85 |
|-----------------------------------------------|------------------------------|---------------------------------|--------------------------------------|
| <b>Demographics</b>                           |                              |                                 |                                      |
| Age (years)                                   | 57.3 (5.3)                   | 56.8 (5.3)                      | 57.6 (5.3)                           |
| Female, n (%)                                 | 107 (70.9%)                  | 48 (72.7%)                      | 59 (69.4%)                           |
| Body mass index                               | 26.4 (4.0)                   | 27.2 (4.3)                      | 25.7 (3.6)                           |
| Highest education level, n (%)*               |                              |                                 |                                      |
| Low                                           | 16 (10.6%)                   | 8 (12.1%)                       | 8 (9.4%)                             |
| Middle                                        | 44 (29.1%)                   | 18 (27.3%)                      | 26 (30.6%)                           |
| High                                          | 88 (58.3%)                   | 39 (59.1%)                      | 49 (57.6%)                           |
| Study center, n (%)                           |                              |                                 |                                      |
| Academic Medical Center Amsterdam             | 55 (36.4%)                   | 22 (33.3%)                      | 33 (38.8%)                           |
| Leiden University Medical Center              | 96 (63.6%)                   | 44 (66.7%)                      | 52 (61.2%)                           |
| <b>Type of phone, n (%)</b>                   |                              |                                 |                                      |
| iPhone                                        | 56 (37.1%)                   | 21 (31.8%)                      | 35 (41.2%)                           |
| Samsung                                       | 59 (39.1%)                   | 30 (45.5%)                      | 29 (34.1%)                           |
| HTC                                           | 15 (9.9%)                    | 6 (9.1%)                        | 9 (10.6%)                            |
| Other                                         | 21 (13.9%)                   | 9 (13.6%)                       | 12 (14.1%)                           |
| <b>Blood pressure</b>                         |                              |                                 |                                      |
| Systolic blood pressure (mmHg)                | 137.8 (18.2)                 | 141.6 (18.3)                    | 134.9 (17.6)                         |
| Diastolic blood pressure (mmHg)               | 85.4 (10.8)                  | 87.3 (10.2)                     | 83.9 (11.0)                          |
| Heart rate (beats per minute)                 | 67.2 (10.2)                  | 67.4 (10.4)                     | 67.0 (10.2)                          |
| <b>Vascular risk factors, n (%)</b>           |                              |                                 |                                      |
| History of hypertension                       | 32 (21.2%)                   | 17 (25.8%)                      | 15 (17.6%)                           |
| History of diabetes mellitus                  | 2 (1.3%)                     | 2 (3.0%)                        | 0 (0.0%)                             |
| History of MI                                 | 4 (4.6%)                     | 2 (3.0%)                        | 2 (2.4%)                             |
| History of arrhythmia                         | 11 (7.3%)                    | 3 (4.5%)                        | 8 (9.4%)                             |
| History of heart failure                      | 3 (2.0%)                     | 1 (1.5%)                        | 2 (2.4%)                             |
| Hypercholesterolemia                          | 14 (9.3%)                    | 4 (6.1%)                        | 10 (11.8%)                           |
| Current smoker                                | 14 (9.3%)                    | 5 (7.6%)                        | 9 (10.6%)                            |
| <b>Antihypertensive medication, n (%)</b>     |                              |                                 |                                      |
| Diuretics                                     | 15 (9.9%)                    | 9 (13.6%)                       | 6 (7.1%)                             |
| Ace-inhibitors                                | 6 (4.0%)                     | 3 (4.5%)                        | 3 (3.5%)                             |
| Beta-blockers                                 | 11 (7.3%)                    | 6 (9.1%)                        | 5 (5.9%)                             |
| Calcium antagonists                           | 6 (4.0%)                     | 2 (3.0%)                        | 4 (4.7%)                             |
| Other antihypertensives                       | 9 (6.0%)                     | 3 (4.5%)                        | 6 (7.1%)                             |
| <b>No. antihypertensive medication, n (%)</b> |                              |                                 |                                      |
| One                                           | 21 (65.6%)                   | 10 (15.2%)                      | 11 (12.9%)                           |
| Two or more                                   | 11 (34.4%)                   | 5 (7.8%)                        | 6 (7.1%)                             |

Data represent mean (standard deviation) unless stated otherwise. Abbreviations: n, number; MI, myocardial infarction; MMSE, mini-mental state examination. \*Missing data for n=3 participants. Low: primary education, lower education, MAVO/MULO.

Intermediate: high general secondary education (HAVO, HBS), Preparatory Scientific Education (VWO), intermediate professional education (MBO). High: higher professional education (HBO), academic education (university).
