# Supplementary material for: Evaluation of the Use of Home Blood Pressure Measurement Using Mobile Phone-Assisted Technology: The iVitality Proof-of-Principle Study
Source: PubMed Central journal article supplement (PMC4923587; doi:10.2196/mhealth.5485), 2016-06-13
Supplement: mhealth_v4i2e67_app2.pdf [file mhealth_v4i2e67_app2.pdf]

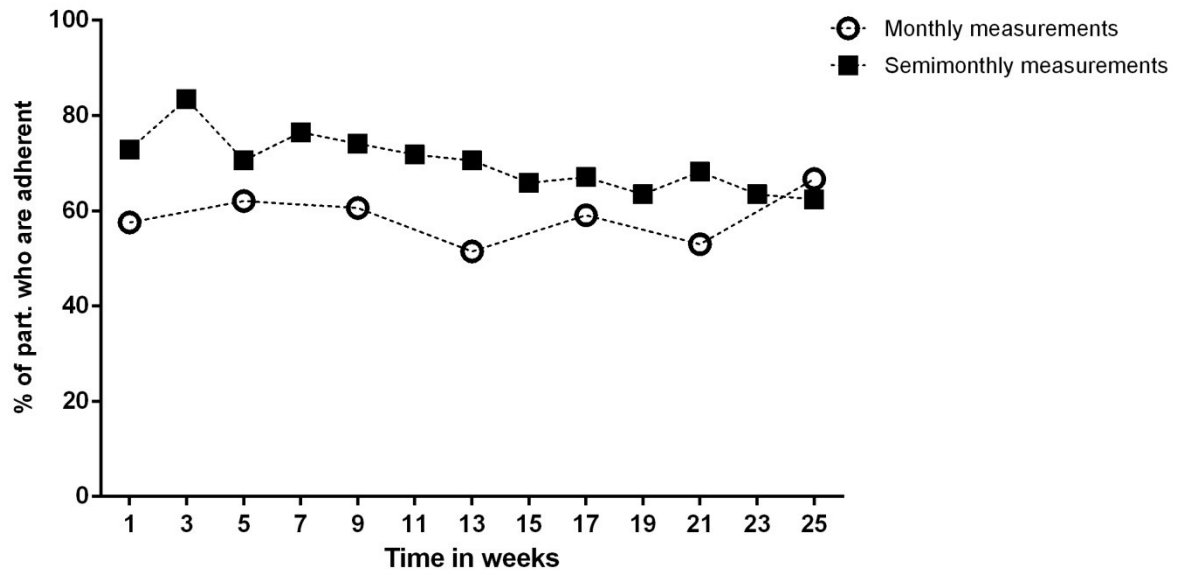

Data represent the percentage of participants who are adherent to perform the expected measurements.
